# Supplementary material for: Simultaneously enabling superior ICE and high rate/cycling stability with a hollow carbon nanosphere anode for sodium-ion storage
Source: Royal Society of Chemistry journal article supplement (doi:10.1039/d4ta02817a), 2024-01-01
Supplement: d4ta02817a1.pdf [file d4ta02817a1.pdf]

## Supporting Information

### **Simultaneously Enabling Superior ICE and High Rate/Cyclic Stability with Hollow Carbon Nanospheres anode for Sodium - Ion Storage**

*Dengke Liu,<sup>a</sup> Yuqian Qiu,<sup>a</sup> Yuxuan Du,<sup>a</sup> Jiaying Yang,<sup>a</sup> Xiaohan Jing,<sup>a</sup> Xu Peng,<sup>a</sup> Qiang Song,<sup>\*</sup> Fei Xu,<sup>\*</sup>*

*<sup>a</sup> State Key Laboratory of Solidification Processing, Center for Nano Energy Materials, School of Materials Science and Engineering, Northwestern Polytechnical University and Shaanxi Joint Laboratory of Graphene (NPU), Xi'an, 710072, PR China.*

*\* Corresponding author Email: [songqiang511@nwpu.edu.cn](mailto:songqiang511@nwpu.edu.cn); [feixu@nwpu.edu.cn](mailto:feixu@nwpu.edu.cn)*

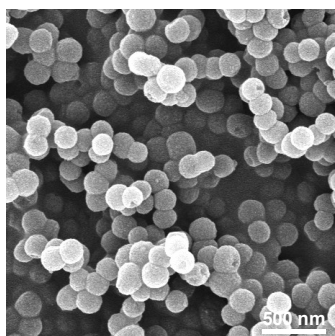

**Figure S1.** SEM images of PACP

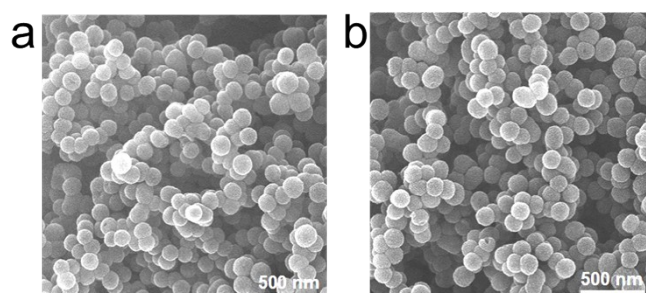

**Figure S2.** SEM images of (a) HCN-1100 and (b) HCN-1500.

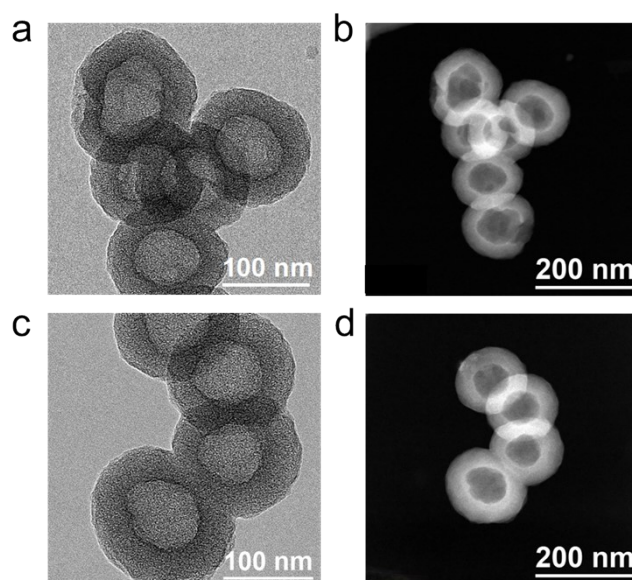

**Figure S3.** (a) TEM image of HCN-1100. (b) HAADF-STEM images of HCN-1100.  
(c) TEM image of HCN-1500. (d) HAADF-STEM images of HCN-1500.

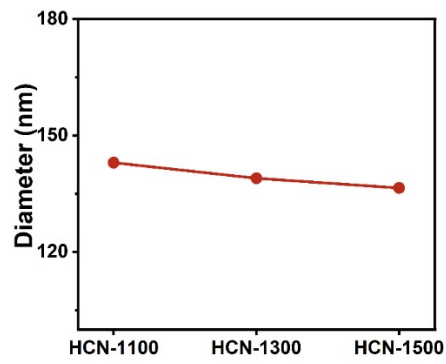

**Figure S4.** The diameter of HCNs.

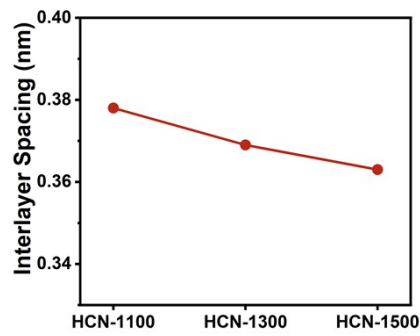

**Figure S5.** The interlayer spacing of HCNs from HRTEM.

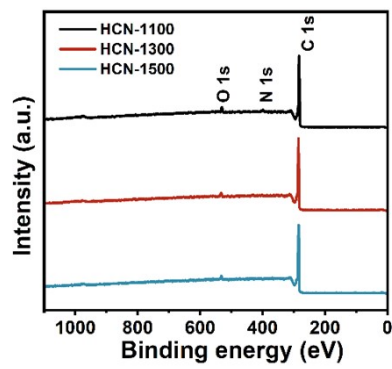

**Figure S6.** XPS Survey spectra of HCNs.

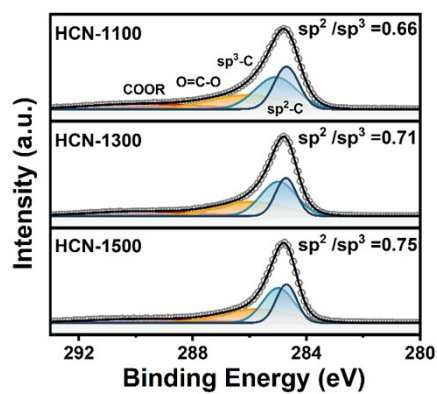

Figure S7. The fitting results of C 1s signals of HCNs.

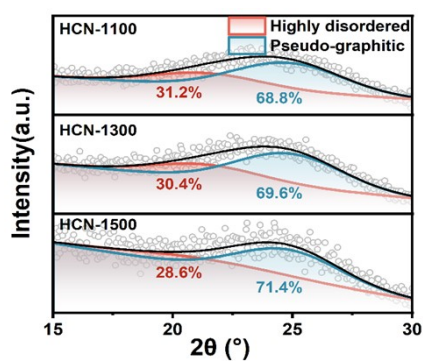

Figure S8. The (002) peak fitting of HCNs in XRD.

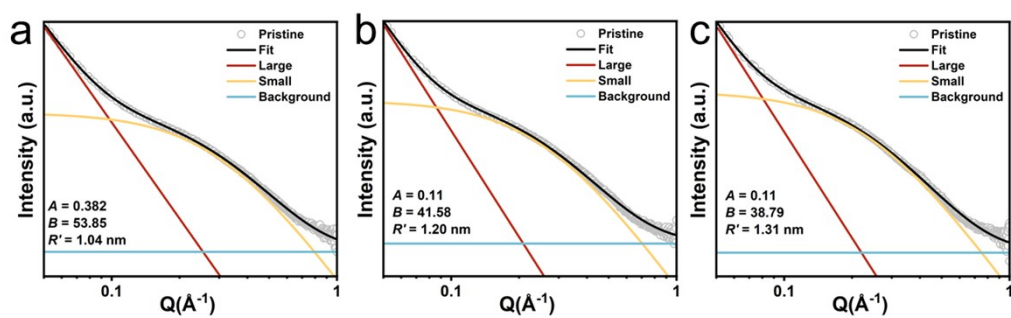

Figure S9. The fitted SAXS patterns of (a) HCN-1100, (b) HCN-1300 and (c) HCN-1500.

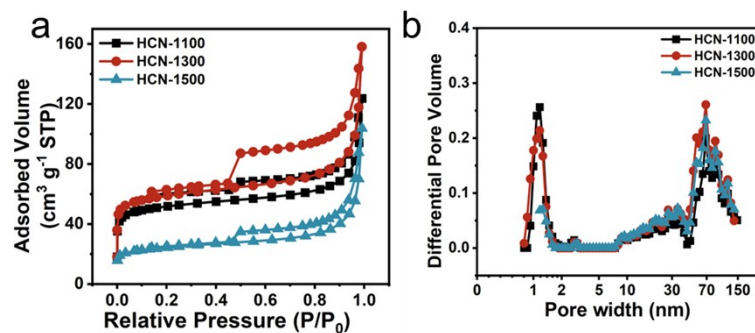

**Figure S10.** (a) N<sub>2</sub> adsorption-desorption isothermal curves of HCNs. (b) The pore size distribution of HCNs.

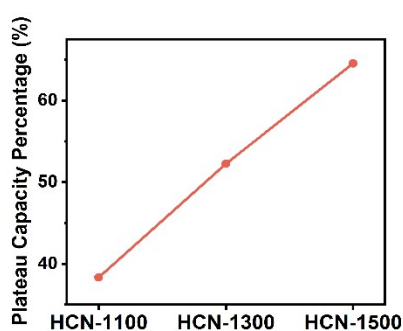

**Figure S11.** The linear correlation between carbonization temperature and plateau capacity.

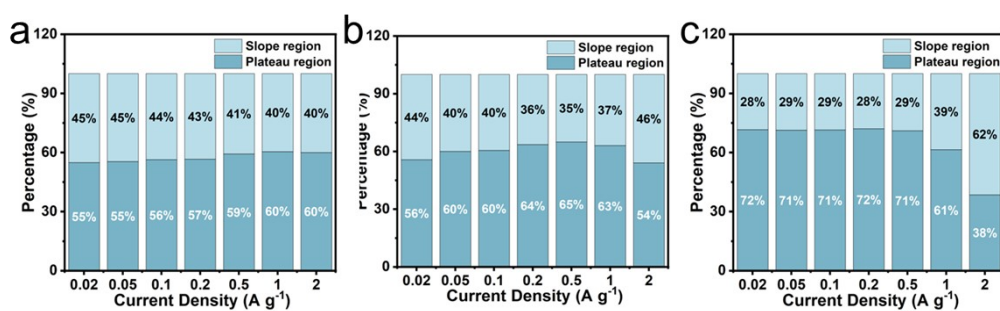

**Figure S12.** The capacity proportion of (a) HCN-1100, HCN-1300 (b) and (c) HCN-1500 at different current density.

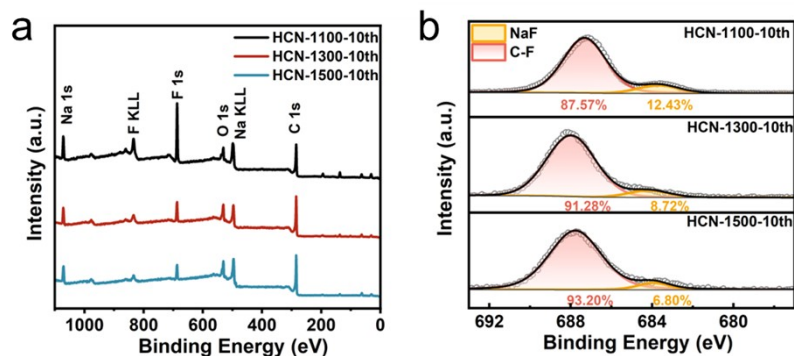

**Figure S13.** (a) XPS Survey spectra of HCNs after 10 cycles. (b) F 1s XPS spectra of HCNs after 10 cycles.

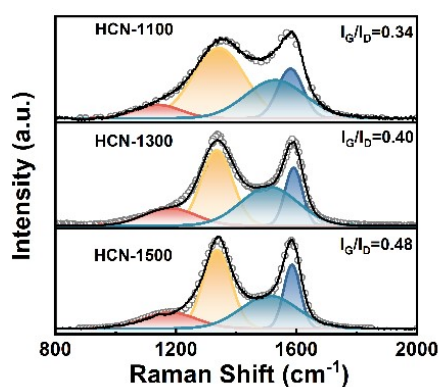

**Figure S14.** The Raman spectroscopy of HCNs after 10 cycles.

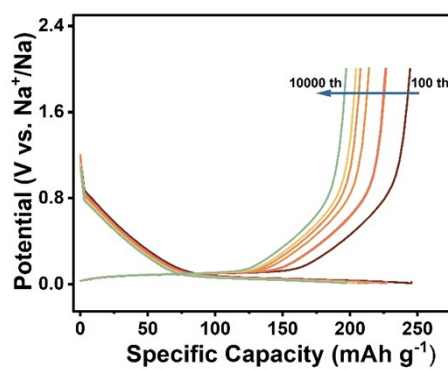

**Figure S15.** Galvanostatic charge/discharge curves for the different cycles at 1 A g<sup>-1</sup> of HCN-1300.

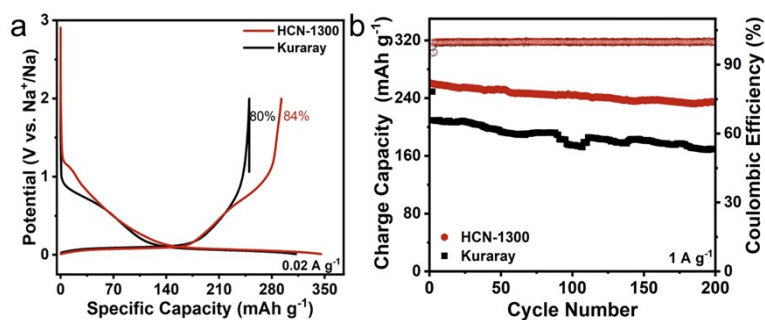

**Figure S16.** (a) Galvanostatic discharge/charge profiles of HCN-1300 and Kuraray at  $0.02 \text{ A g}^{-1}$ . (b) Cycle performance at  $1 \text{ A g}^{-1}$  of HCN-1300 and Kuraray.

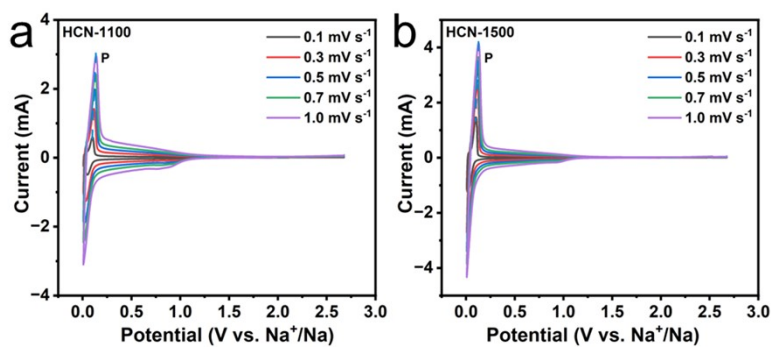

**Figure S17.** The CV curves of (a) HCN-1100 and (b) HCN-1500 at various scan rates.

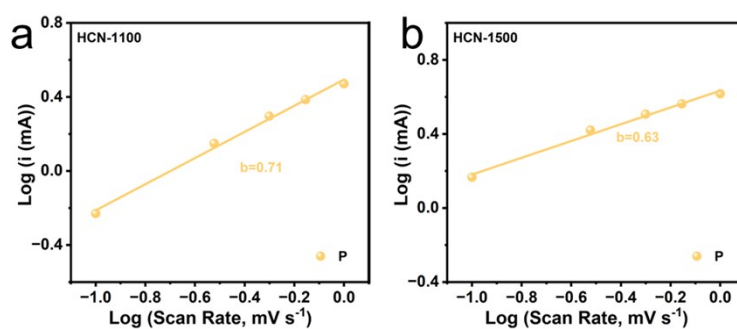

**Figure S18.** Relationship between peak currents and scan rates of (a) HCN-1100 and (b) HCN-1500.

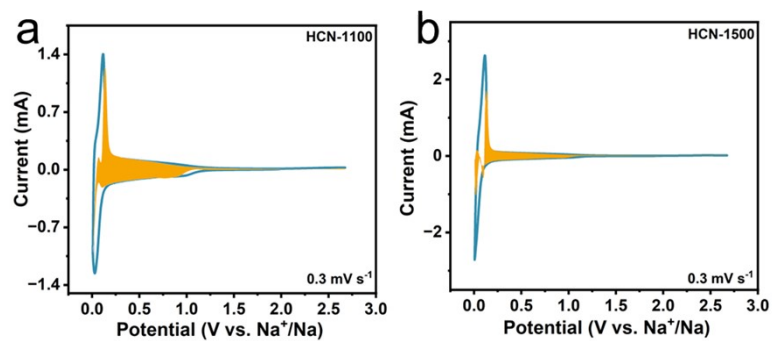

**Figure S19.** CV curve with a calculated capacitive contribution of (a) HCN-1100 and (b) HCN-1500 at  $0.3 \text{ mV s}^{-1}$ .

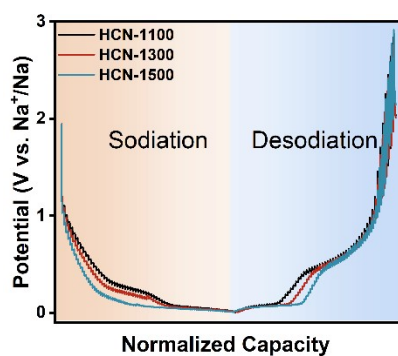

**Figure S20.** GITT potential profiles.

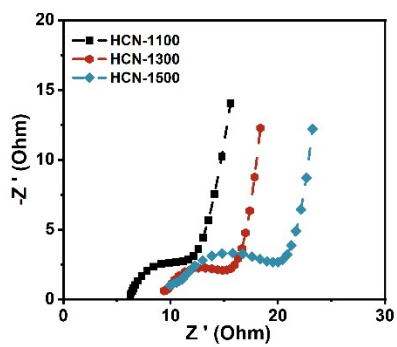

**Figure S21.** EIS measurements of HCNs.



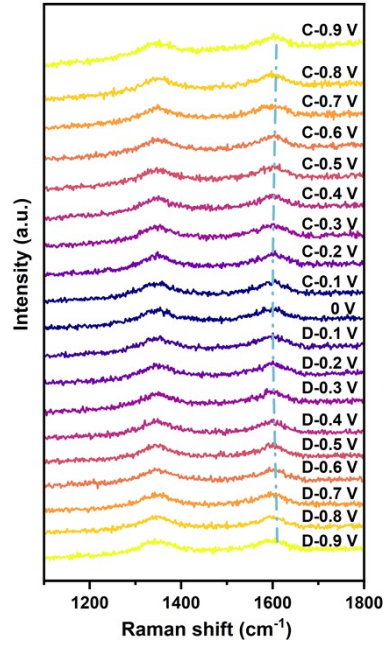

**Figure S22.** *In-situ* Raman spectra of HCN-1300, “C” stands for the charge state and “D” stands for the discharge state.

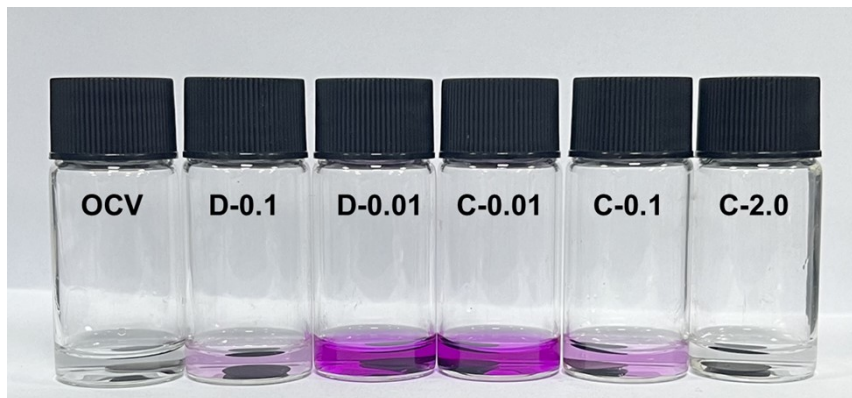

**Figure S23.** The color changes of ethanol containing 1% phenolphthalein after reaction with HCN-1300 at different potentials.

**Table S1.** Structure Parameters of HCNs.

| Sample   | $I_G/I_D$ | $L_a$ (nm) | $d_{002}$ (nm) | $L_c$ (nm) | $d_{\text{closed pore}}$ (nm) |
|----------|-----------|------------|----------------|------------|-------------------------------|
| HCN-1100 | 0.37      | 7.12       | 0.38           | 1.24       | 1.04                          |
| HCN-1300 | 0.44      | 8.51       | 0.37           | 1.36       | 1.21                          |
| HCN-1500 | 0.66      | 12.73      | 0.36           | 1.52       | 1.31                          |

**Table S2.** Comparison of ICE performance hollow carbon nanospheres anodes.

| Sample       | ICE   | Ref.      |
|--------------|-------|-----------|
| NNCS         | 20.47 | S1        |
| BFNHCS       | 24.7  | S2        |
| N-HCSs       | 30.28 | S3        |
| HCS          | 36    | S4        |
| DHCSs        | 37    | S5        |
| NCS          | 41.5  | S6        |
| 3DHPCMs-800  | 41.9  | S7        |
| PTA-NHCS-700 | 44.1  | S8        |
| N-DHCS       | 44.64 | S9        |
| HCF          | 47    | S10       |
| PCS          | 47.5  | S11       |
| P-HCS        | 56    | S12       |
| HCS-3        | 61.3  | S13       |
| 4S-HCNs      | 72    | S14       |
| HTCS-900     | 80    | S15       |
| HCN-1300     | 84    | This work |

**Table S3.** Comparison of long cycling performance, ICE and rate performances with reported hard carbon materials.

| Sample                  | ICE   | Cycle | Rate performance                                     |      |                                                     |
|-------------------------|-------|-------|------------------------------------------------------|------|-----------------------------------------------------|
|                         |       |       | (Capacity/Current)                                   | Ref. | HCN-1300<br>(This work)                             |
| LCS-73                  | 82.9  | 1400  | 114 mAh g <sup>-1</sup><br>(0.5 A g <sup>-1</sup> )  | S16  | 261 mAh g <sup>-1</sup><br>(0.5 A g <sup>-1</sup> ) |
| FHC-1300                | 80    | 1000  | 107.1 mAh g <sup>-1</sup><br>(2 A g <sup>-1</sup> )  | S17  | 175 mAh g <sup>-1</sup><br>(2 A g <sup>-1</sup> )   |
| H-1500                  | ~71   | 400   | 175 mAh g <sup>-1</sup><br>(2 A g <sup>-1</sup> )    | S18  | 175 mAh g <sup>-1</sup><br>(2 A g <sup>-1</sup> )   |
| HCK-1                   | 80.4  | 600   | 138 mAh g <sup>-1</sup><br>(2 A g <sup>-1</sup> )    | S19  | 175 mAh g <sup>-1</sup><br>(2 A g <sup>-1</sup> )   |
| AMHC-900                | 76    | 2500  | 63 mAh g <sup>-1</sup><br>(1 A g <sup>-1</sup> )     | S20  | 230 mAh g <sup>-1</sup><br>(1 A g <sup>-1</sup> )   |
| SC-3                    | 77    | 100   | -                                                    | S21  | -                                                   |
| CC-700                  | 48    | 8000  | 120.6 mAh g <sup>-1</sup><br>(1 A g <sup>-1</sup> )  | S22  | 230 mAh g <sup>-1</sup><br>(1 A g <sup>-1</sup> )   |
| H300-1100               | 82.5  | 1000  | 60 mAh g <sup>-1</sup><br>(1 A g <sup>-1</sup> )     | S23  | 230 mAh g <sup>-1</sup><br>(1 A g <sup>-1</sup> )   |
| PNDCs-500CDs-<br>1200°C | 68.42 | 2500  | ~40 mAh g <sup>-1</sup><br>(2 A g <sup>-1</sup> )    | S24  | 175 mAh g <sup>-1</sup><br>(2 A g <sup>-1</sup> )   |
| POP3-1200               | 67.5  | 500   | ~85 mAh g <sup>-1</sup><br>(0.6 A g <sup>-1</sup> )  | S25  | 261 mAh g <sup>-1</sup><br>(0.5 A g <sup>-1</sup> ) |
| WNSC                    | 83.1  | 800   | ~50 mAh g <sup>-1</sup><br>(2 A g <sup>-1</sup> )    | S26  | 175 mAh g <sup>-1</sup><br>(2 A g <sup>-1</sup> )   |
| CeI-O300-1500           | 74.8  | 50    | ~45.1 mAh g <sup>-1</sup><br>(2 A g <sup>-1</sup> )  | S27  | 175 mAh g <sup>-1</sup><br>(2 A g <sup>-1</sup> )   |
| CM-180                  | 78.4  | 100   | 90.5 mAh g <sup>-1</sup><br>(0.3 A g <sup>-1</sup> ) | S28  | 261 mAh g <sup>-1</sup><br>(0.5 A g <sup>-1</sup> ) |
| MW-900                  | 70.1  | 50    | ~83 mAh g <sup>-1</sup><br>(0.5 A g <sup>-1</sup> )  | S29  | 261 mAh g <sup>-1</sup><br>(0.5 A g <sup>-1</sup> ) |
| HCN-1300                | 84    | 10000 | This work                                            |      |                                                     |
|                         |       |       |                                                      |      |                                                     |
|                         |       |       |                                                      |      |                                                     |

## References

- S1 W. Zhang, C. Lan, X. Xie, Q. Cao, M. Zheng, H. Dong, H. Hu, Y. Xiao, Y. Liu and Y. Liang, *J. Colloid Interface Sci.*, 2019, **546**, 53-59.
- S2 X. Zhao, Y. Zhang, T. Liu, M. Xiao, B. Du, X. Lu, F. Zhu and Y. Meng, *J. Electroanal. Chem.*, 2023, **941**, 117553.
- S3 Y. Wen, B. Wang, B. Luo and L. Wang, *Eur. J. Inorg. Chem.*, 2016, **2016**, 2051-2055.
- S4 J. Ye, J. Zang, Z. Tian, M. Zheng and Q. Dong, *J. Mater. Chem. A*, 2016, **4**, 13223-13227.
- S5 L. Bu, X. Kuai, W. Zhu, X. Huang, K. Tian, H. Lu, J. Zhao and L. Gao, *Electrochim. Acta*, 2020, **356**, 136804.
- S6 K. Tang, L. Fu, R. J. White, L. Yu, M.-M. Titirici, M. Antonietti and J. Maier, *Adv. Energy Mater.*, 2012, **2**, 873-877.
- S7 G. Zou, H. Hou, X. Cao, P. Ge, G. Zhao, D. Yin and X. Ji, *J. Mater. Chem. A*, 2017, **5**, 23550-23558.
- S8 G. Huang, Q. Kong, J. Jiang, W. Yao and Q. Wang, *ChemSusChem*, 2022, **15**, e202201310.
- S9 K. Zhang, X. Li, J. Liang, Y. Zhu, L. Hu, Q. Cheng, C. Guo, N. Lin and Y. Qian, *Electrochim. Acta*, 2015, **155**, 174-182.
- S10 S. Feng, K. Li, P. Hu, C. Cai, J. Liu, X. Li, L. Zhou, L. Mai, B.-L. Su and Y. Liu, *ACS Nano*, 2023, **17**, 23152-23159.
- S11 D. Cheng, Z. Li, M. Zhang, Z. Duan, J. Wang and C. Wang, *ACS Nano*, 2023, **17**, 19063-19075.
- S12 L. Liu, Q. Li, Z. Wang and Y. Chen, *Mater. Technol.*, 2018, **33**, 748-753.
- S13 X. Chen, Y. Fang, H. Lu, H. Li, X. Feng, W. Chen, X. Ai, H. Yang and Y. Cao, *Small*, 2021, **17**, 2102248.
- S14 D.-S. Bin, Y. Li, Y.-G. Sun, S.-Y. Duan, Y. Lu, J. Ma, A.-M. Cao, Y.-S. Hu and L.-J. Wan, *Adv. Energy Mater.*, 2018, **8**, 1800855.
- S15 W. Zhong, D. Cheng, M. Zhang, H. Zuo, L. Miao, Z. Li, G. Qiu, A. Cheng and H. Zhang, *Carbon*, 2022, **198**, 278-288.
- S16 H. Chen, N. Sun, Q. Zhu, R. A. Soomro and B. Xu, *Adv. Sci.*, 2022, **9**, 2200023.
- S17 Z. Hou, D. Lei, M. Jiang, Y. Gao, X. Zhang, Y. Zhang and J.-G. Wang, *ACS Appl. Mater. Interfaces*, 2023, **15**, 1367-1375.
- S18 Z. Tang, R. Zhang, H. Wang, S. Zhou, Z. Pan, Y. Huang, D. Sun, Y. Tang, X. Ji, K. Amine and M. Shao, *Nat. Commun.*, 2023, **14**, 6024.
- S19 Z. Hou, M. Jiang, D. Lei, X. Zhang, Y. Gao and J.-G. Wang, *Nano Res.*, 2024, **17**, 5188-5196.
- S20 A. Patel, R. Mishra, R. K. Tiwari, A. Tiwari, D. Meghnani, S. K. Singh and R. K. Singh, *J. Energy Storage*, 2023, **72**, 108424.
- S21 Q. Li, X. Liu, Y. Tao, J. Huang, J. Zhang, C. Yang, Y. Zhang, S. Zhang, Y. Jia, Q. Lin, Y. Xiang, J. Cheng, W. Lv, F. Kang, Y. Yang and Q.-H. Yang, *Natl. Sci. Rev.*, 2022, **9**, nwa084.
- S22 R. Hao, Y. Yang, H. Wang, B. Jia, G. Ma, D. Yu, L. Guo and S. Yang, *Nano Energy*, 2018, **45**, 220-228.
- S23 M. Song, Z. Yi, R. Xu, J. Chen, J. Cheng, Z. Wang, Q. Liu, Q. Guo, L. Xie and C. Chen, *Energy Storage Mater.*, 2022, **51**, 620-629.
- S24 Y. Huang, X. Zhong, X. Hu, Y. Li, K. Wang, H. Tu, W. Deng, G. Zou, H. Hou and X. Ji, *Adv. Funct. Mater.*, 2024, **34**, 2308392.

- S25 L. Ji, Y. Zhao, L. Cao, Y. Li, C. Ma, X. Qi and Z. Shao, *J. Mater. Chem. A*, 2023, **11**, 26727-26741.
- S26 L. Shang, R. Yuan, H. Liu, X. Li, B. Zhao, X. Liu, A. Li, X. Chen and H. Song, *Carbon*, 2024, **223**, 119038.
- S27 B. Zhao, X. Li, L. Shang, C. Qiu, R. Yuan, H. Liu, T. Liu, A. Li, X. Chen and H. Song, *J. Mater. Chem. A*, 2024, **12**, 5834-5845.
- S28 S. Zhang, N. Sun, M. Jiang, R. A. Soomro and B. Xu, *Carbon*, 2023, **209**, 118034.
- S29 P. Zhang, Y. Shu, Y. Wang, J. Ye and L. Yang, *J. Mater. Chem. A*, 2023, **11**, 2920-2932.
